# Supplementary material
Source: PubMed Central journal article supplement (PMC1851868)

**Supplemental Figure. Analysis of lysosomes, HSP90, and ubiquitin in M83 Tg mice after PQ/MB exposure.** Anti-Lamp-2 antibody was used to label lysosomes in immuno-EM studies. Immuno-EM micrographs reveal lysosomes with a variety of morphological shapes in hippocampal neurons from M83 Tg mice after pesticide treatment. Immunolabeling indicates that a subset of lysosomes contain homogenous matrices and lipid particles (**A; left panel**), while the other subset contains membranous/tubular degraded structures (**A; right panel**) with or without lipid particles. These morphological variations are easily found in NTg and M7Tg mice after PQ/MB-treatment. Scale bar = 50 nm. Western blot (**B**) and immunohistochemical (**C**) analyses show HSP90 in M83 Tg mouse cerebellum (*CB*) and brain stem (*BS*) after saline and pesticide exposure. Western blot (**D**) and immunohistochemical (**E**) analyses of saline- and PQ/MB-treated M83 Tg mice show ubiquitinated proteins in the cerebellum (*CB*) and brain stem (*BS*) of these mice.

# SUPPLEMENTAL FIGURE

## A. M83 PQ/MB

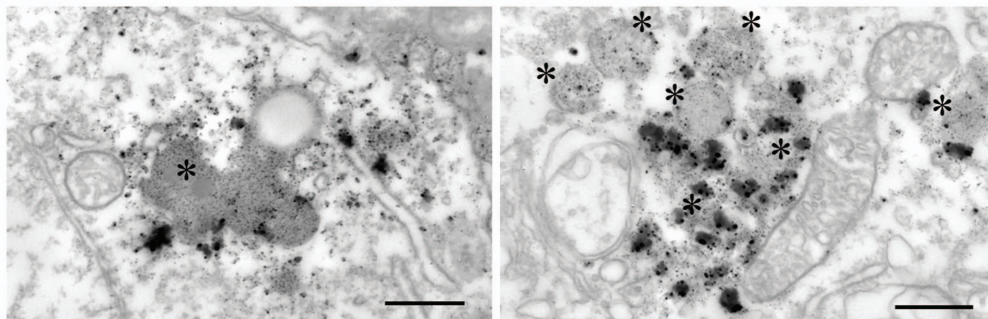

## B.

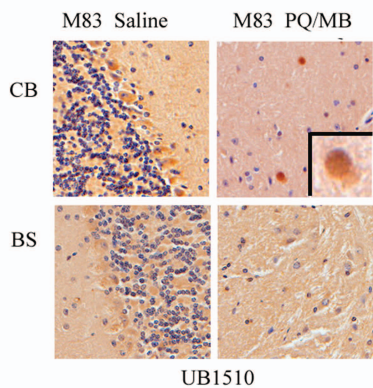

## C.

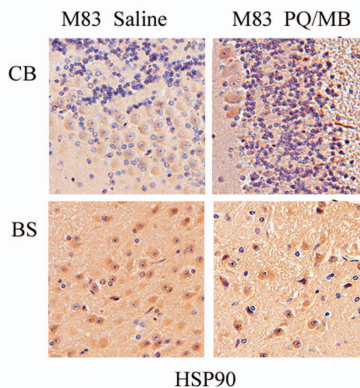

## D.

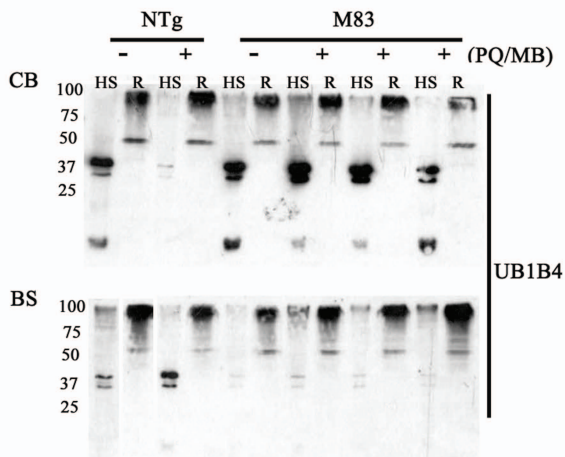

## E.

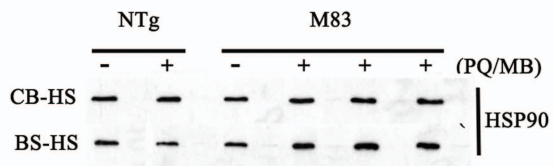

Supplement: amjpathol_170_2_658__1.pdf [file amjpathol_170_2_658__1.pdf]
